# Supplementary material for: A comparison of Jason-2 plasmasphere electron content measurements with ground-based measurements
Source: Copernicus journal article supplement (doi:10.5194/angeo-41-269-2023), 2023-06-20
Supplement: Supplementary file 2 [file angeo-41-269-2023-supplement.zip]

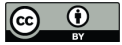

## *Supplement of*

# **A comparison of Jason-2 plasmasphere electron content measurements with ground-based measurements**

**Andrew J. Mazzella Jr. and Endawoke Yizengaw**

*Correspondence to:* Andrew J. Mazzella Jr. ([ajmazzella@brandeis.edu](mailto:ajmazzella@brandeis.edu))

- [angeo-41-269-2023-supplement-title-page.pdf](#)
- [Descriptions.txt](#)
- [Fig01](#)
  - [MPathAll.lst](#)
- [Fig03](#)
  - [MnByPass.nth](#)
  - [MnByPass.sth](#)
- [Fig04](#)
  - [JttrMdl.tbl](#)
  - [SPECvals.tbl](#)
- [Fig05](#)
  - [12050000.T05](#)
  - [12050000.T15](#)
  - [12050000.T18](#)
  - [12050000.T21](#)
  - [12050000.T25](#)
  - [12050000.T26](#)
  - [12050000.T29](#)
  - [12050012.T08](#)
  - [12050013.T07](#)
  - [12050018.T10](#)
  - [12050020.T03](#)
  - [12050028.T13](#)

- 12050032.T19
- 12050032.T28
- 12050036.T23
- 12050049.T11
- 12050050.T17
- 12050051.T20
- 12050052.T24
- 12050058.T32
- 12050101.T04
- 12050111.T31
- 12050119.T25
- 12050120.T12
- 12050122.T14
- 12050130.T22
- 12050138.T29
- 12050139.T16
- 12050143.T06
- 12050143.T18
- 12050145.T03
- 12050148.T21
- 12050154.T15
- 12050157.T19
- 12050204.T26
- 12050208.T27
- 12050209.T08
- 12050210.T09
- 12050214.T28
- 12050215.T05
- 12050230.T17
- 12050233.T10
- 12050242.T04
- 12050245.T13
- 12050247.T02
- 12050255.T23
- 12050307.T20
- 12050311.T32
- 12050316.T31
- 12050317.T16
- 12050329.T03
- 12050330.T06
- 12050333.T19
- 12050333.T24

- 12050339.T11
- 12050339.T14
- 12050340.T22
- 12050354.T18
- 12050355.T09
- 12050359.T27
- 12050402.T15
- 12050412.T12
- 12050413.T26
- 12050415.T17
- 12050418.T25
- 12050430.T05
- 12050433.T02
- 12050442.T29
- 12050443.T04
- 12050446.T10
- 12050452.T07
- 12050456.T08
- 12050500.T13
- 12050506.T16
- 12050507.T23
- 12050521.T03
- 12050521.T20
- 12050523.T19
- 12050523.T28
- 12050524.T32
- 12050528.T11
- 12050528.T24
- 12050540.T17
- 12050547.T14
- 12050553.T22
- 12050555.T09
- 12050556.T12
- 12050557.T31
- 12050559.T25
- 12050611.T18
- 12050616.T29
- 12050620.T15
- 12050628.T21
- 12050635.T26
- 12050644.T05
- 12050651.T08

- 12050654.T07
- 12050702.T28
- 12050705.T10
- 12050715.T17
- 12050716.T13
- 12050719.T01
- 12050719.T04
- 12050721.T23
- 12050730.T20
- 12050733.T24
- 12050733.T32
- 12050742.T12
- 12050742.T31
- 12050745.T25
- 12050757.T14
- 12050803.T29
- 12050806.T16
- 12050809.T22
- 12050816.T06
- 12050820.T03
- 12050821.T21
- 12050822.T18
- 12050833.T19
- 12050836.T09
- 12050837.T15
- 12050838.T27
- 12050848.T26
- 12050851.T28
- 12050859.T05
- 12050907.T12
- 12050907.T17
- 12050911.T02
- 12050913.T01
- 12050913.T10
- 12050916.T04
- 12050921.T25
- 12050925.T13
- 12050929.T23
- 12050937.T29
- 12050945.T16
- 12050946.T20
- 12050949.T32

- 12050950.T31
- 12050956.T06
- 12050959.T03
- 12051016.T11
- 12051016.T14
- 12051018.T24
- 12051021.T22
- 12051036.T18
- 12051037.T09
- 12051038.T27
- 12051045.T12
- 12051049.T25
- 12051051.T15
- 12051104.T29
- 12051105.T26
- 12051108.T05
- 12051114.T02
- 12051119.T01
- 12051124.T10
- 12051125.T07
- 12051127.T08
- 12051133.T13
- 12051136.T16
- 12051141.T23
- 12051143.T03
- 12051150.T19
- 12051158.T28
- 12051159.T20
- 12051203.T11
- 12051204.T24
- 12051205.T32
- 12051213.T17
- 12051223.T31
- 12051230.T14
- 12051233.T25
- 12051235.T12
- 12051239.T22
- 12051250.T18
- 12051250.T29
- 12051301.T15
- 12051303.T06
- 12051303.T21

- 12051305.T16
- 12051309.T03
- 12051309.T26
- 12051320.T05
- 12051321.T08
- 12051325.T07
- 12051331.T28
- 12051340.T10
- 12051347.T13
- 12051347.T17
- 12051356.T04
- 12051357.T23
- 12051411.T02
- 12051413.T20
- 12051420.T32
- 12051422.T31
- 12051423.T25
- 12051435.T16
- 12051445.T03
- 12051446.T06
- 12051448.T14
- 12051449.T22
- 12051450.T19
- 12051502.T18
- 12051510.T09
- 12051510.T27
- 12051511.T15
- 12051516.T28
- 12051519.T26
- 12051532.T17
- 12051536.T12
- 12051538.T05
- 12051549.T02
- 12051550.T01
- 12051551.T04
- 12051554.T10
- 12051607.T13
- 12051607.T29
- 12051611.T07
- 12051612.T23
- 12051621.T16
- 12051627.T20

- 12051632.T32
- 12051634.T03
- 12051637.T06
- 12051637.T19
- 12051642.T24
- 12051643.T11
- 12051649.T28
- 12051655.T14
- 12051659.T22
- 12051706.T09
- 12051708.T17
- 12051710.T27
- 12051713.T12
- 12051715.T18
- 12051718.T25
- 12051723.T15
- 12051733.T29
- 12051738.T26
- 12051748.T02
- 12051750.T05
- 12051750.T21
- 12051803.T08
- 12051806.T07
- 12051809.T10
- 12051821.T28
- 12051822.T13
- 12051829.T23
- 12051833.T04
- 12051835.T17
- 12051838.T20
- 12051840.T24
- 12051841.T11
- 12051842.T32
- 12051856.T31
- 12051858.T12
- 12051902.T25
- 12051905.T14
- 12051916.T22
- 12051918.T29
- 12051928.T18
- 12051934.T21
- 12051935.T16

- 12051938.T06
- 12051943.T03
- 12051944.T15
- 12051952.T27
- 12051953.T09
- 12051955.T26
- 12052006.T05
- 12052007.T08
- 12052008.T28
- 12052021.T10
- 12052022.T17
- 12052025.T02
- 12052026.T01
- 12052029.T04
- 12052030.T12
- 12052035.T13
- 12052039.T23
- 12052046.T25
- 12052048.T20
- 12052052.T31
- 12052056.T32
- 12052102.T16
- 12052115.T06
- 12052116.T03
- 12052120.T14
- 12052123.T19
- 12052128.T22
- 12052141.T11
- 12052142.T18
- 12052147.T09
- 12052152.T27
- 12052157.T15
- 12052204.T12
- 12052209.T25
- 12052211.T26
- 12052216.T05
- 12052223.T02
- 12052223.T29
- 12052224.T01
- 12052230.T10
- 12052234.T04
- 12052240.T07



- 12052241.T13
- 12052248.T23
- 12052249.T16
- 12052250.T08
- 12052300.T03
- 12052301.T06
- 12052306.T19
- 12052306.T20
- 12052311.T32
- 12052318.T11
- 12052319.T24
- 12052335.T14
- 12052335.T17
- 12052343.T22
- 12052343.T31
- 12052350.T12
- 12052351.T25

- Fig06

- AfrSel.lst

- Fig07

- AfrDay.lst
- AfrNgt.lst
- GErrDay.lst
- GErrNgt.lst
- JErrDay.lst
- JErrNgt.lst
- JasonDay.lst
- JasonNgt.lst
- PIMDay.lst
- PIMNgt.lst

- Fig09

- PCmpTbl.lst

- Supplement.pdf

The copyright of individual parts of the supplement might differ from the article licence.
